# Supplementary material for: Genome-Wide Epigenetic Perturbation Jump-Starts Patterns of Heritable Variation Found in Nature
Source: Oxford University Press journal article supplement (doi:10.1534/genetics.111.128744), 2011-05-19
Supplement: figures1.pdf [file figures1.pdf]

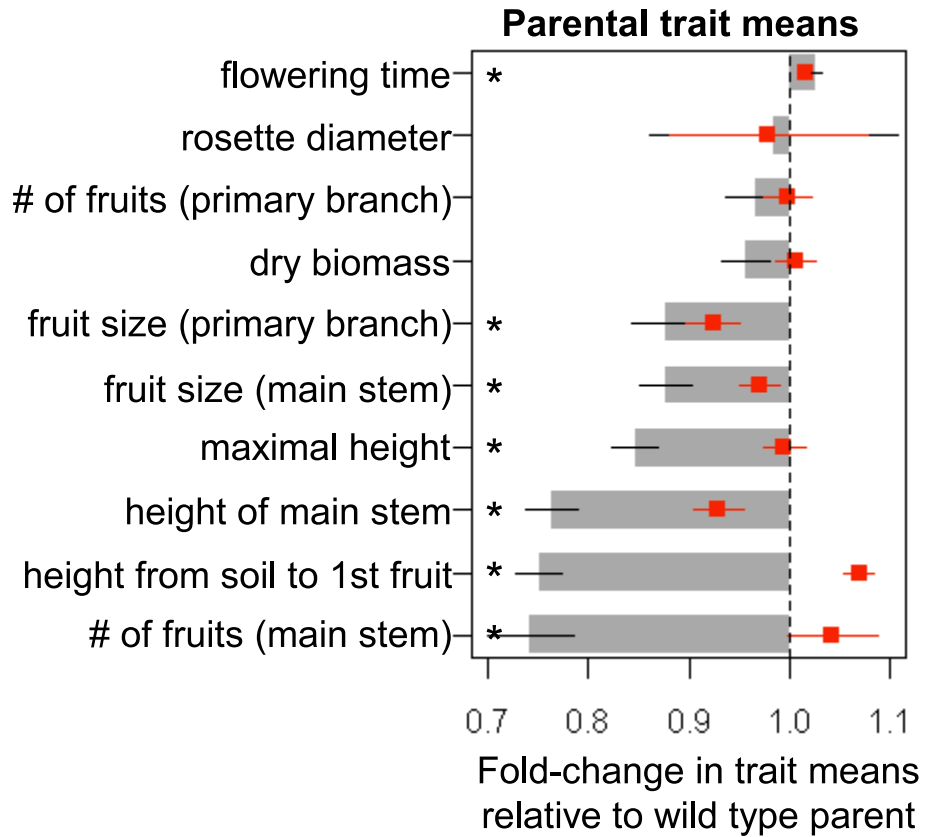

**Figure S1** Fold change ( $\pm$ SE) in trait means of mutant parent (gray bars) relative to the wt parent (dashed line); asterisks indicate significant two-sided t-test at  $P < 0.05$  testing for differences between the parents. For comparison, we also plot the fold-change ( $\pm$ SE) of the epiRIL trait means relative to the wt parent (red squares). The epiRIL means are typically closer to those of the wt.
