# Supplementary material for: Genome-Wide Epigenetic Perturbation Jump-Starts Patterns of Heritable Variation Found in Nature
Source: Oxford University Press journal article supplement (doi:10.1534/genetics.111.128744), 2011-05-19
Supplement: figures2.pdf [file figures2.pdf]

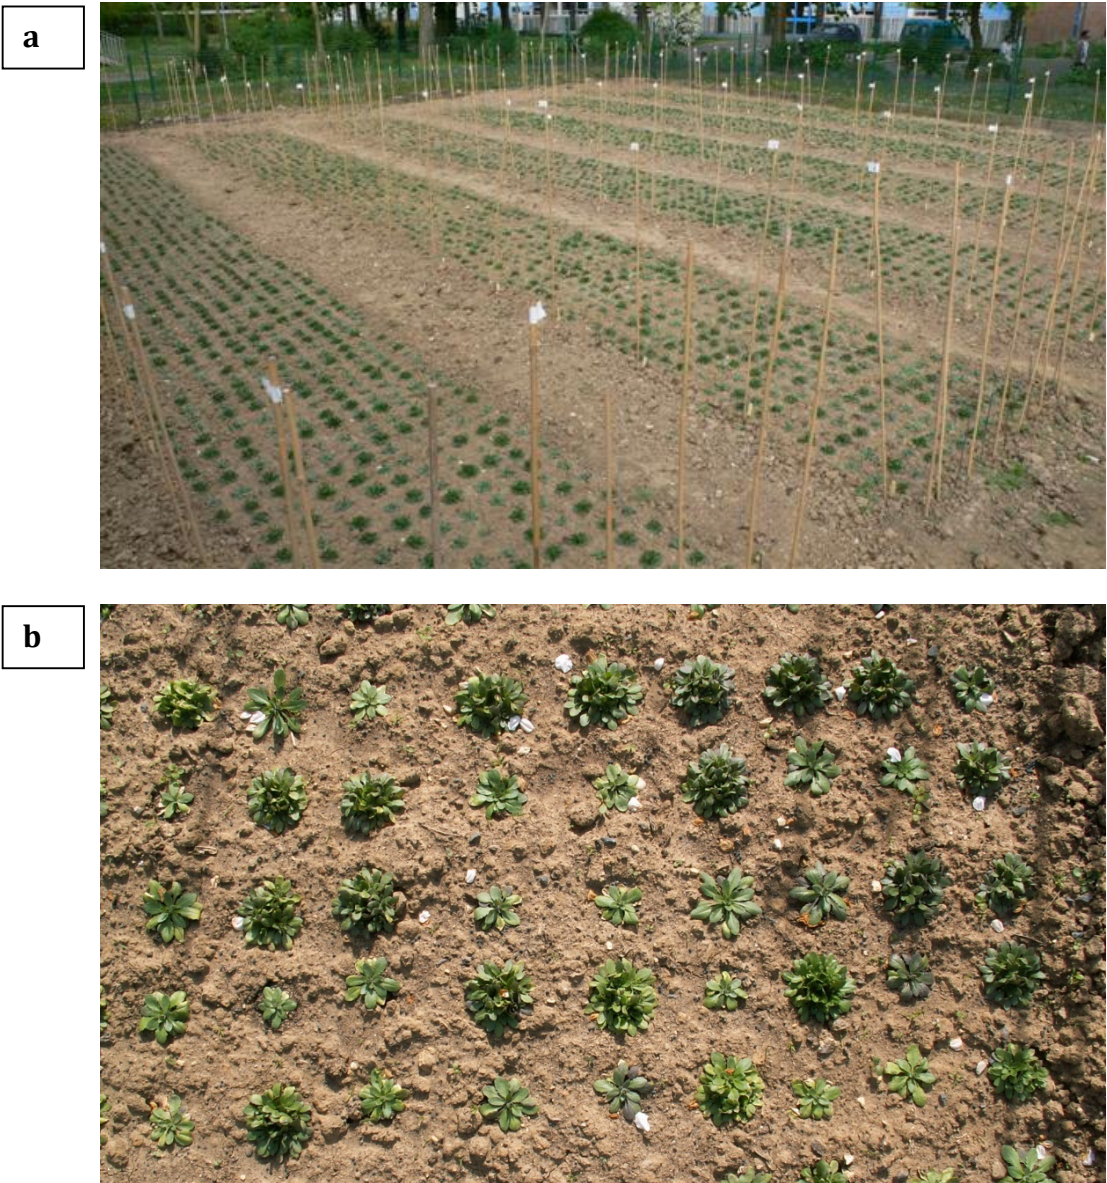

**Figure S2** Field experiment. a. Six experimental blocks, each being represented by grid of 11 lines by 110 columns. b. 10-cm spacing among focal plants.
