# Supplementary material for: Genome-Wide Epigenetic Perturbation Jump-Starts Patterns of Heritable Variation Found in Nature
Source: Oxford University Press journal article supplement (doi:10.1534/genetics.111.128744), 2011-05-19
Supplement: tables1.pdf [file tables1.pdf]

**Table S1 Parental phenotypic means**

| trait name                    | Col- <i>ddm1</i> |       | Col-wt |       | t value | df     | p value  |
|-------------------------------|------------------|-------|--------|-------|---------|--------|----------|
|                               | n                | mean  | n      | mean  |         |        |          |
| flowering time                | 117              | 43.40 | 116    | 42.34 | -4.00   | 223.17 | < 0.0001 |
| rosette diameter              | 59               | 4.90  | 58     | 5.00  | 1.15    | 110.75 | 0.20     |
| # of fruits (primary branch)  | 28               | 7.33  | 30     | 7.59  | 1.07    | 51.52  | 0.29     |
| dry biomass                   | 97               | 5.73  | 96     | 5.98  | 1.77    | 186.30 | 0.08     |
| fruit size (primary branch)   | 28               | 10.44 | 30     | 11.90 | 3.24    | 54.03  | < 0.0001 |
| fruit size (main stem)        | 28               | 12.30 | 30     | 14.03 | 4.48    | 55.93  | < 0.0001 |
| maximal height                | 95               | 27.75 | 95     | 32.77 | 6.29    | 164.94 | < 0.0001 |
| height of main stem           | 96               | 27.06 | 95     | 35.46 | 7.78    | 152.76 | < 0.0001 |
| height from soil to 1st fruit | 95               | 7.11  | 95     | 9.47  | 9.81    | 158.78 | < 0.0001 |
| # of fruits (main stem)       | 28               | 12.30 | 30     | 14.03 | 4.91    | 51.82  | < 0.0001 |

Provided are the parental phenotypic means along with the results of a two-sided t-test evaluating significant differences between the Col-*ddm1* and Col-wt parents. In the case of unequal trait variances, a Welch modification to the degrees of freedom (df) is used.
