# Supplementary material for: Genome-Wide Epigenetic Perturbation Jump-Starts Patterns of Heritable Variation Found in Nature
Source: Oxford University Press journal article supplement (doi:10.1534/genetics.111.128744), 2011-05-19
Supplement: tables2.pdf [file tables2.pdf]

**TABLE S2 Heritability estimates in the epiRILs and natural accessions**

| trait name                    | Population | <i>n</i> | $H^2$    | (s.e)  | $\chi^2$ | df | <i>P</i> value |
|-------------------------------|------------|----------|----------|--------|----------|----|----------------|
| flowering time                | epiRILs    | 5567     | 0.2997   | 0.0109 | 1225.14  | 1  | < 0.0001       |
|                               | accessions | 356      | 0.8602   | 0.0142 | 610.91   | 1  | < 0.0001       |
| fruit size (main stem)        | epiRILs    | 1317     | < 0.0001 | 0.0054 | 0        | 1  | 0.99804        |
|                               | accessions | 86       | 0.6017   | 0.0790 | 48.54    | 1  | < 0.0001       |
| height from soil to 1st fruit | epiRILs    | 4535     | 0.1571   | 0.0112 | 408.38   | 1  | < 0.0001       |
|                               | accessions | 292      | 0.4164   | 0.0430 | 118.42   | 1  | < 0.0001       |
| maximal height                | epiRILs    | 4543     | 0.0628   | 0.0102 | 138.96   | 1  | < 0.0001       |
|                               | accessions | 293      | 0.4032   | 0.0428 | 113.56   | 1  | < 0.0001       |
| height of main stem           | epiRILs    | 4561     | 0.0393   | 0.0091 | 87       | 1  | < 0.0001       |
|                               | accessions | 292      | 0.3593   | 0.0447 | 95.89    | 1  | < 0.0001       |
| fruit size (primary branch)   | epiRILs    | 1326     | 0.0392   | 0.0060 | 16.49    | 1  | < 0.0001       |
|                               | accessions | 86       | 0.1858   | 0.0861 | 9.15     | 1  | 0.00249        |
| # of fruits (main stem)       | epiRILs    | 1330     | < 0.0001 | 0.0050 | 0        | 1  | 0.99633        |
|                               | accessions | 88       | 0.1394   | 0.0807 | 6.52     | 1  | 0.01067        |
| dry biomass                   | epiRILs    | 4586     | 0.0184   | 0.0083 | 39.18    | 1  | < 0.0001       |
|                               | accessions | 294      | 0.0075   | 0.0229 | 1.09     | 1  | 0.29624        |
| rosette diameter              | epiRILs    | 2789     | 0.0160   | 0.0116 | *        | *  | *              |
|                               | accessions | 177      | 0.0069   | 0.0378 | *        | *  | *              |
| # of fruits (primary branch)  | epiRILs    | 1333     | < 0.0001 | 0.0030 | 0        | 1  | 0.99817        |
|                               | accessions | 87       | < 0.0001 | 0.0262 | 0        | 1  | 0.99991        |

\* No values available because  $H^2$  were based on average estimates in this case (see Supporting Methods). However, 95% confidence ( $\pm 1.96 \times$  s.e.) intervals include zero suggesting non-significance.

Provided are the broad-sense heritability estimates ( $H^2$ ) for the epiRILs and natural accessions. Estimates were obtained from a random effects model as described in the Supporting Methods. \* No values available because  $H^2$  were based on average estimates in this case (see Supporting methods). However, 95% confidence ( $\pm 1.96 \times$  s.e.) intervals include zero suggesting non-significance.
